# Supplementary material
Source: MDPI journal article supplement (https://www.mdpi.com/2304-6740/11/12/471)
Supplement: s1 [file s1]

## Contents

|          |                                                      |           |
|----------|------------------------------------------------------|-----------|
| <b>1</b> | <b>NMR Spectra .....</b>                             | <b>2</b>  |
| <b>2</b> | <b>Details on Quantum Chemical Calculations.....</b> | <b>8</b>  |
| <b>3</b> | <b>Cyclic Voltammetry .....</b>                      | <b>8</b>  |
| <b>4</b> | <b>Single Crystal X-Ray Diffraction.....</b>         | <b>9</b>  |
| <b>5</b> | <b>Literature .....</b>                              | <b>11</b> |

# 1 NMR Spectra

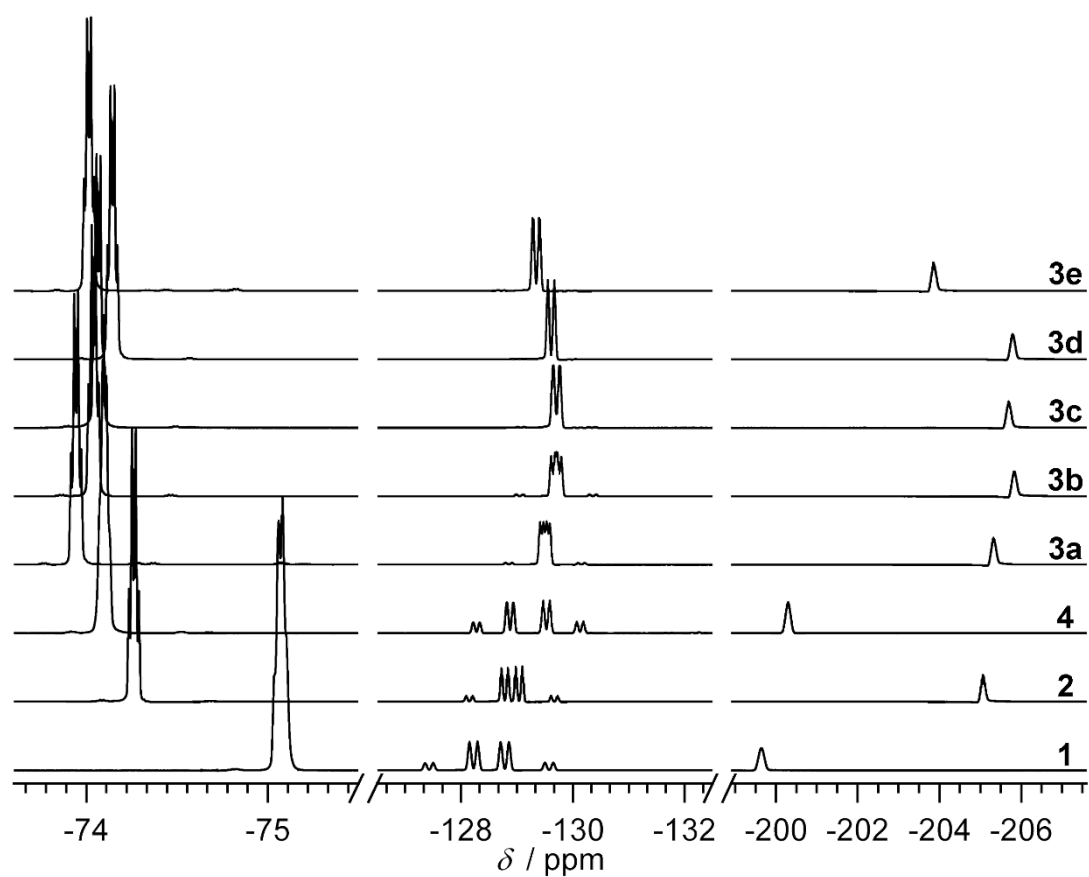

**Figure S1.**  $^{19}\text{F}$  NMR spectra of hexafluoroisopropylborane adducts.

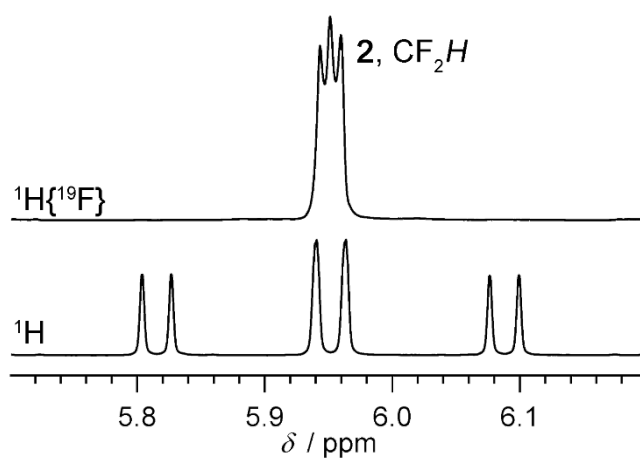

**Figure S2.** Section of the  $^{19}\text{F}$  and  $^{19}\text{F}\{^1\text{H}\}$  spectrum of **2**.

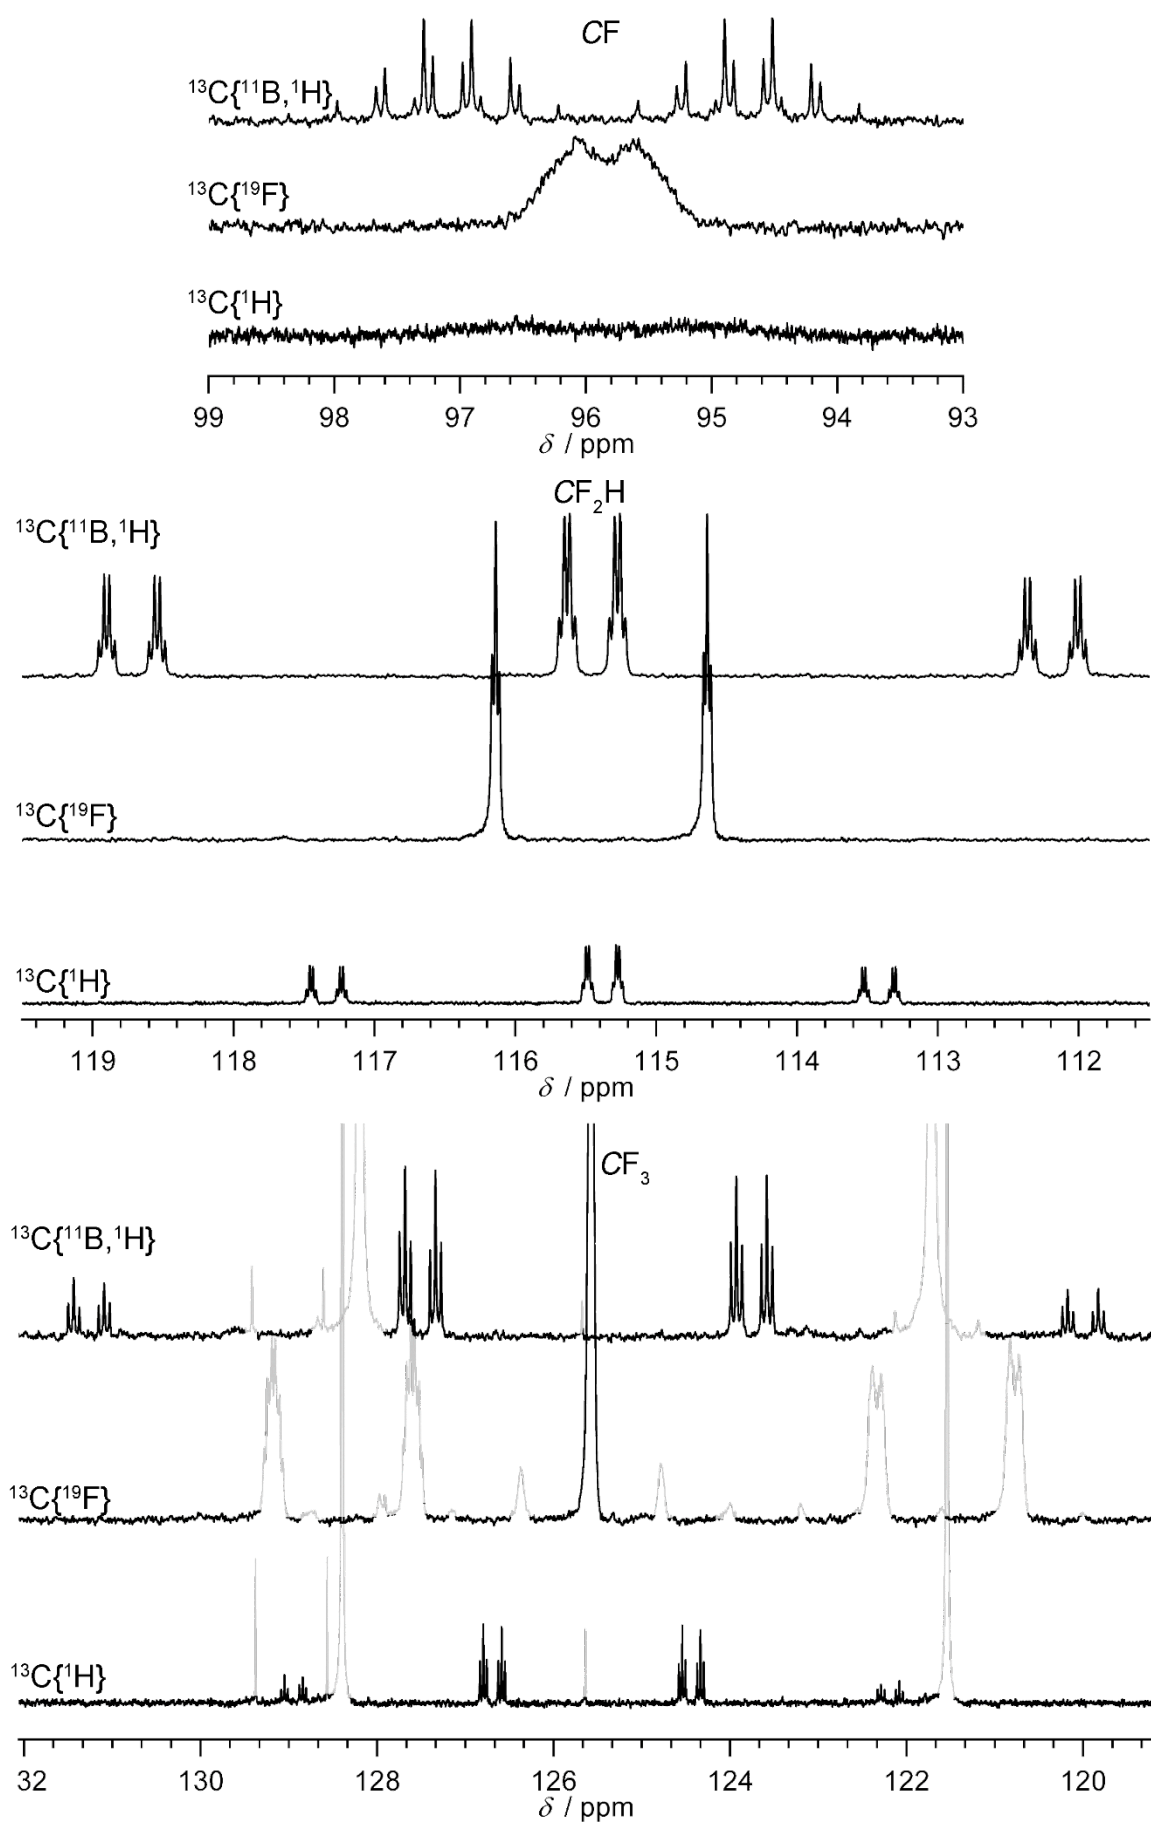

**Figure S3.**  $^{13}\text{C}\{^1\text{H}\}$  (bottom),  $^{13}\text{C}\{^{19}\text{F}\}$  (middle), and  $^{13}\text{C}\{^{11}\text{B}, ^1\text{H}\}$  NMR spectra (top) of **3b** ( $^{13}\text{C}\{^1\text{H}\}$  NMR (125.76 MHz),  $^{13}\text{C}\{^{19}\text{F}\}$  NMR (125.76 MHz), and  $^{13}\text{C}\{^{11}\text{B}, ^1\text{H}\}$  NMR (75.48 MHz)).

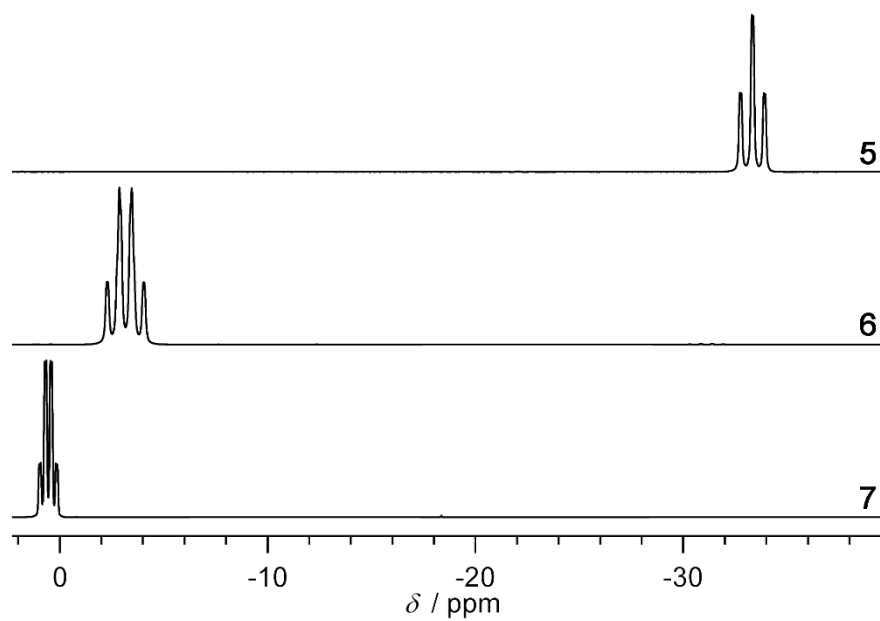

**Figure S4.**  $^{11}\text{B}$  NMR spectra of hexafluoroisopropylborates.

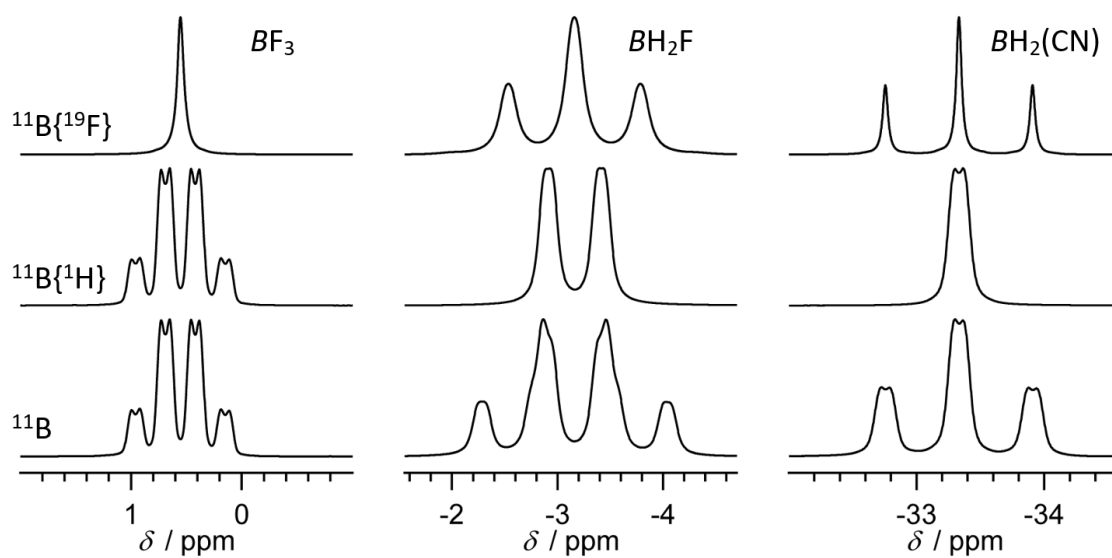

**Figure S5.**  $^{11}\text{B}$  (top),  $^{11}\text{B}\{^1\text{H}\}$  (middle), and  $^{11}\text{B}\{^{19}\text{F}\}$  NMR spectra (top) of **7** (left), **6** (middle), and **5** (right).

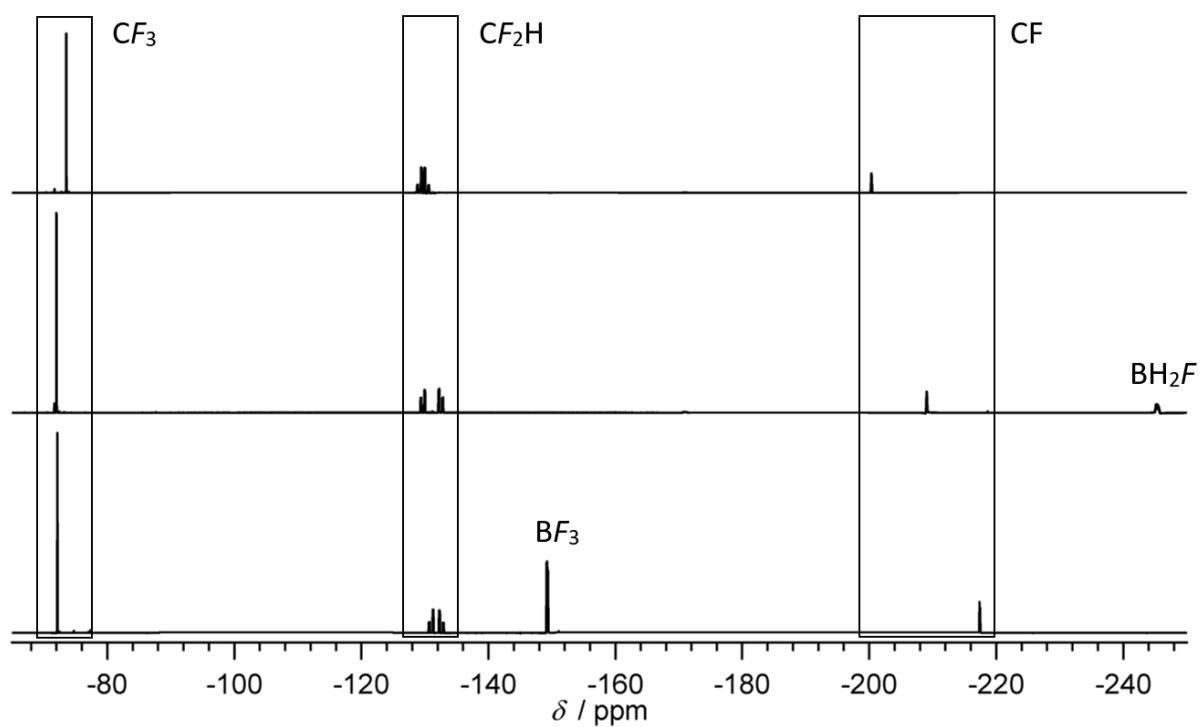

**Figure S6.**  $^{19}\text{F}$  NMR spectra of **5** (top), **6** (middle), and **7** (bottom).

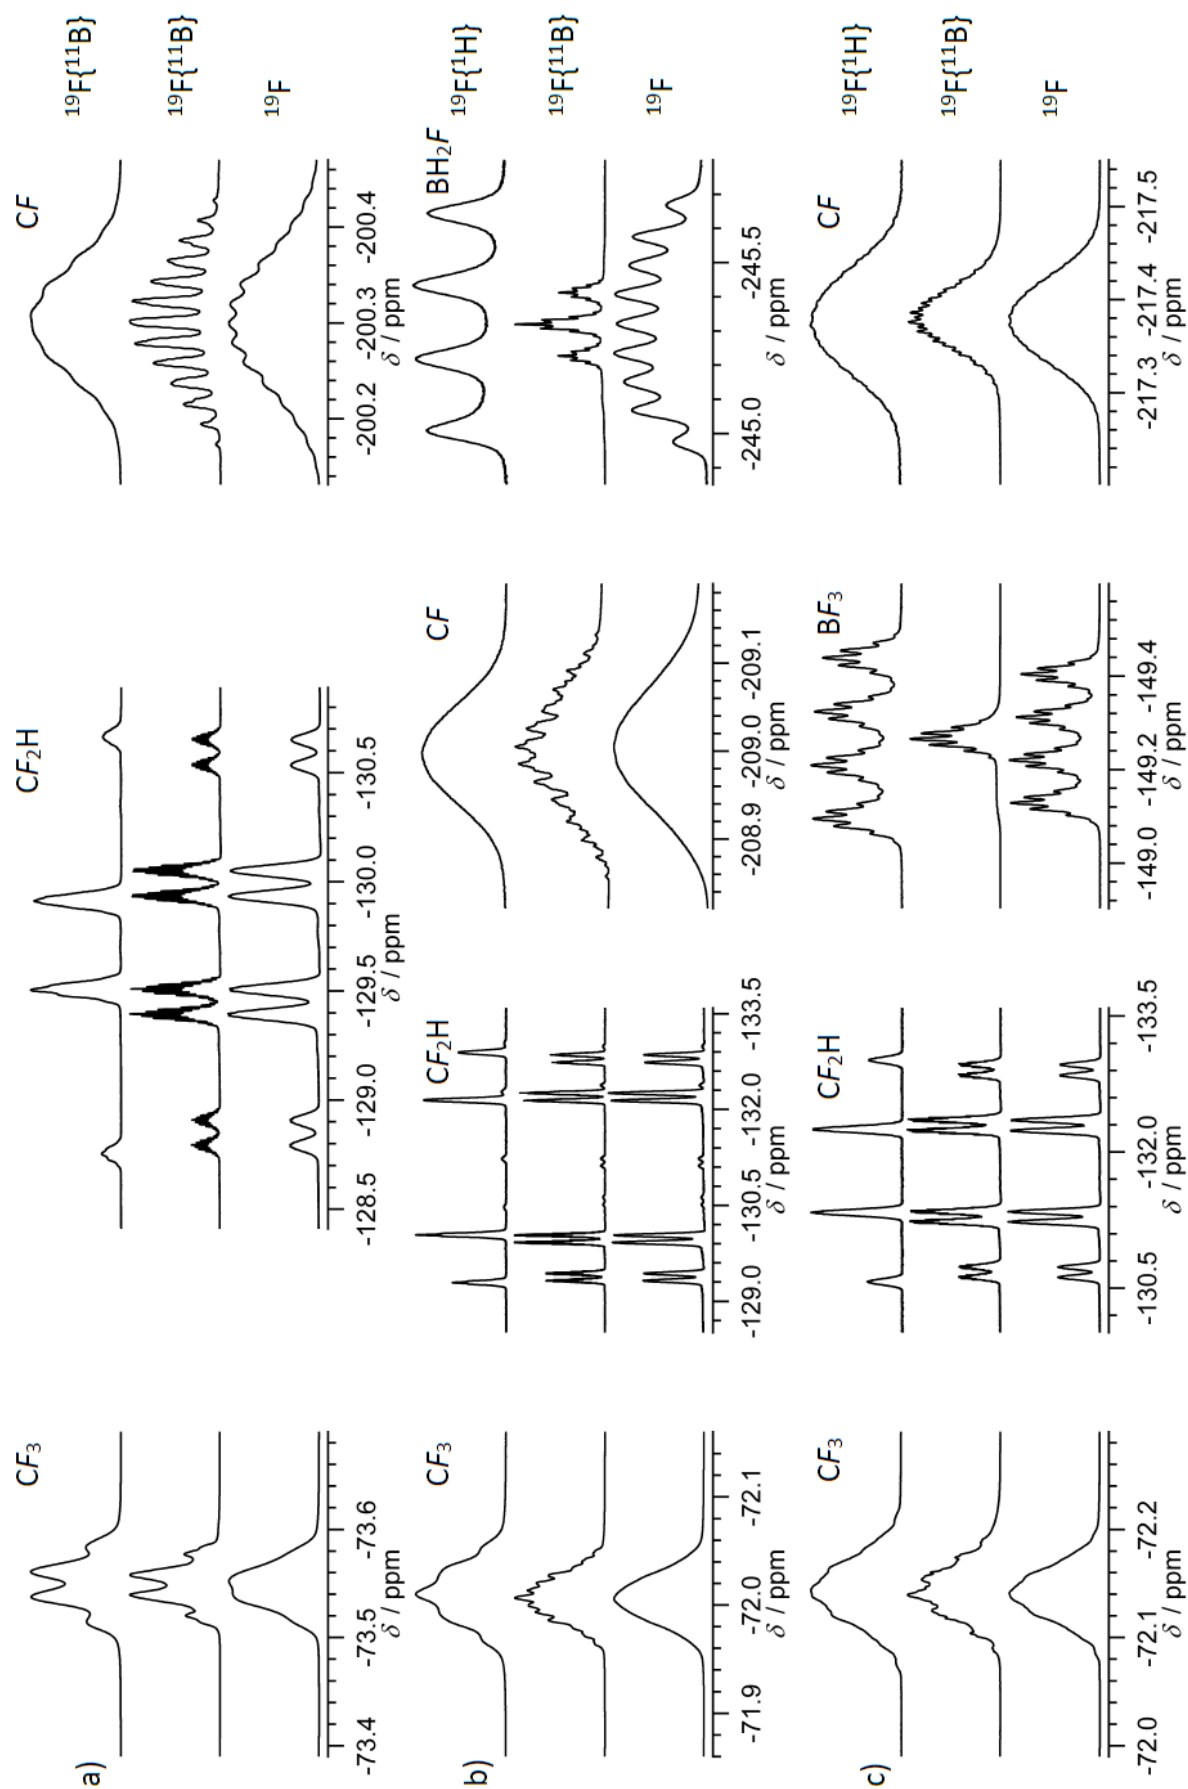

**Figure S7.**  $^{19}\text{F}$ ,  $^{19}\text{F}\{^{11}\text{B}\}$ , and  $^{19}\text{F}\{^1\text{H}\}$  NMR spectra of **5** (a, top), **6** (b, middle), and **7** (c, bottom,  $^{19}\text{F}$ -NMR (470.59 MHz),  $^{19}\text{F}\{^{11}\text{B}\}$ -NMR (470.59 MHz),  $^{19}\text{F}\{^1\text{H}\}$ -NMR (376.82 MHz)).

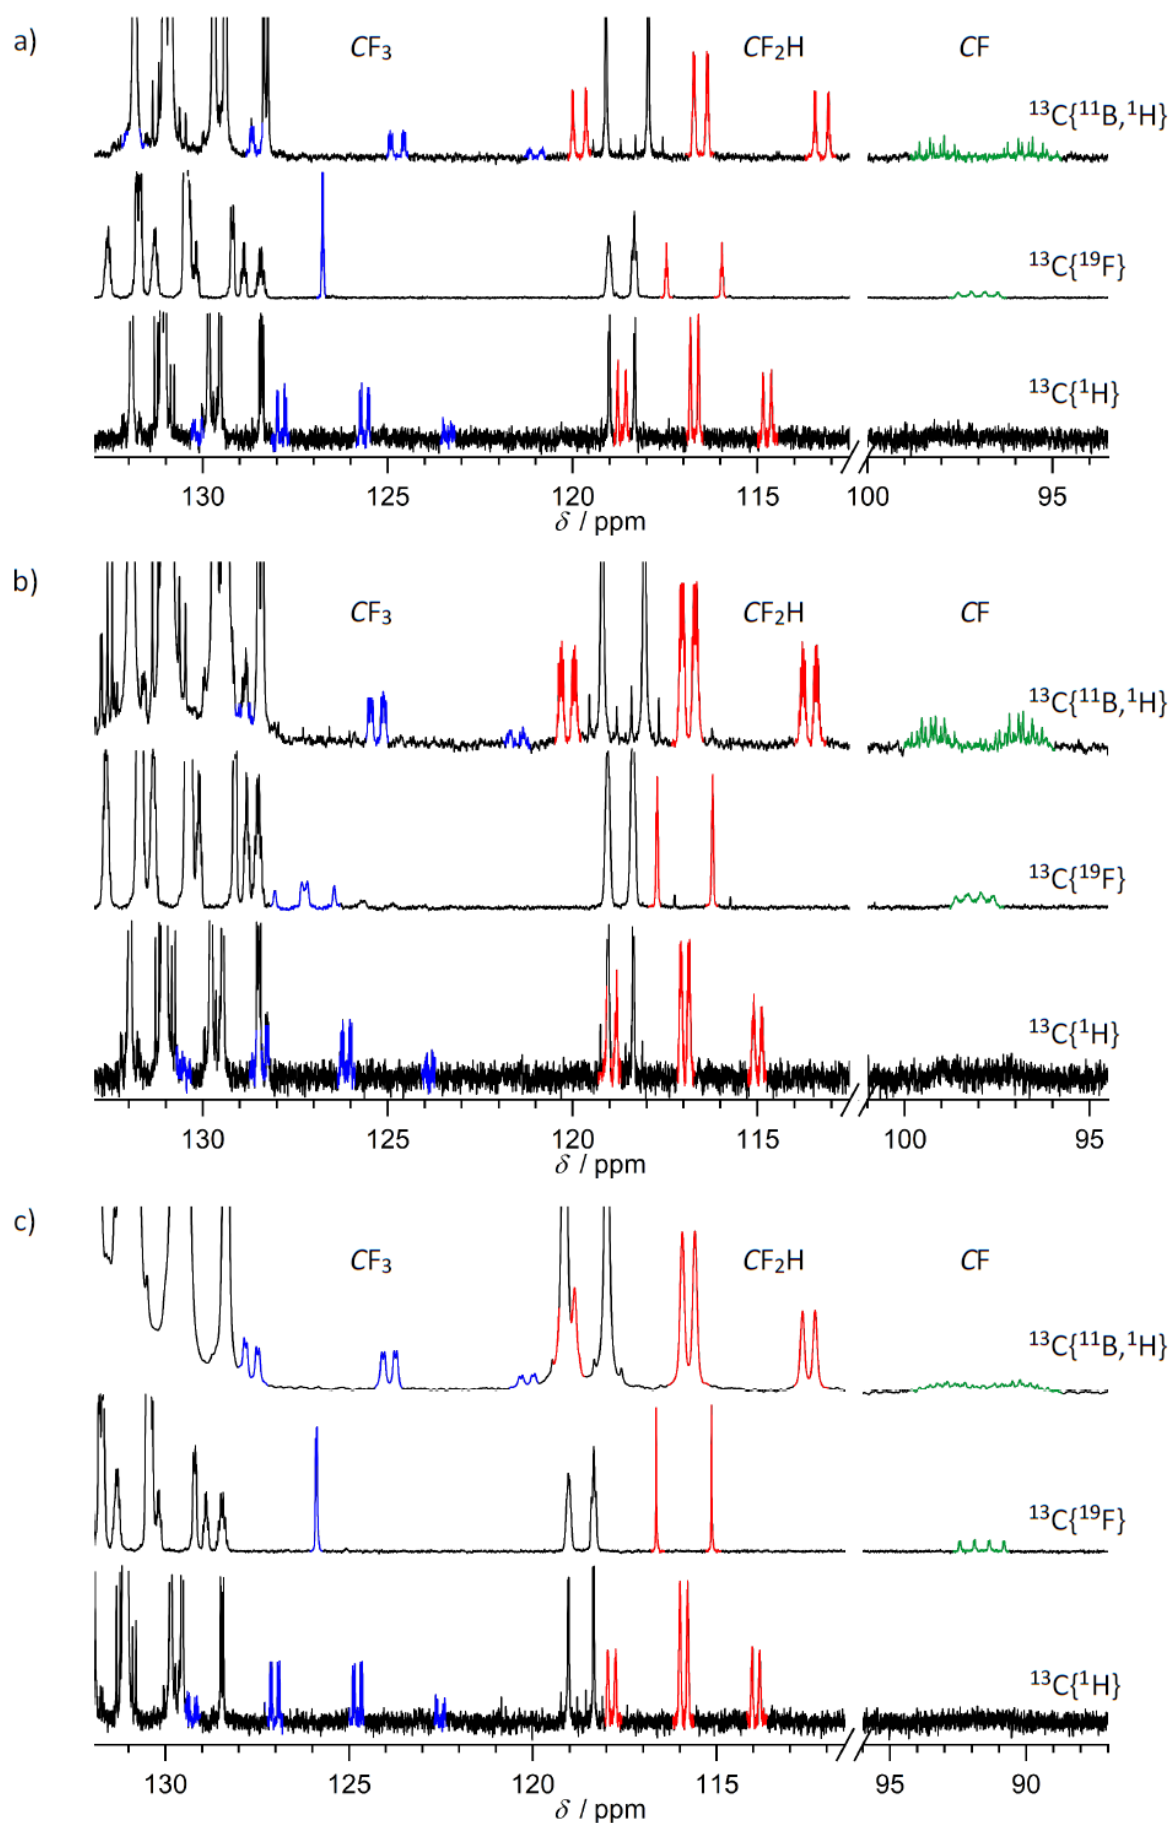

**Figure S8.**  $^{13}\text{C}\{^1\text{H}\}$ ,  $^{13}\text{C}\{^{19}\text{F}\}$ , and  $^{13}\text{C}\{^{11}\text{B}, ^1\text{H}\}$  NMR spectra of **5** (a, top), **6** (b, middle), and **7** (c, bottom,  $^{13}\text{C}\{^1\text{H}\}$ -NMR (125.76 MHz),  $^{13}\text{C}\{^{19}\text{F}\}$ -NMR (125.76 MHz),  $^{13}\text{C}\{^{11}\text{B}, ^1\text{H}\}$ -NMR (75.48 MHz)).

## 2 Details on Quantum Chemical Calculations

Density functional calculations (DFT) [1] were carried out using the B3LYP functional [2-5] with the Gaussian16 program suite [6]. Geometries were optimized, and energies were calculated with the 6-311++G(d,p) basis sets. Diffuse functions were incorporated because improved energies are obtained for the anion [7]. All calculated structures represent true minima with no imaginary frequency on the respective hypersurface. Calculated energies are summarized in Table S1.

**Table S1.** Calculated electronic energies (EE), energies with zero-point corrections ( $E_0$ ), enthalpies (H), and free energies (G) at the B3LYP/6-311++G(d,p) level of theory.

| Species   | Symmetry | EE / a.u.   | $E_0$ / a.u. | H / a.u.    | G / a.u.    |
|-----------|----------|-------------|--------------|-------------|-------------|
| <b>2</b>  | $C_1$    | -1080.89911 | -1080.73974  | -1080.72253 | -1080.78564 |
| <b>3a</b> | $C_1$    | -966.57734  | -966.43386   | -966.41901  | -966.47638  |
| <b>3b</b> | $C_1$    | -1005.89848 | -1005.72750  | -1005.71087 | -1005.77279 |
| <b>3c</b> | $C_1$    | -1123.87527 | -1123.61918  | -1123.59857 | -1123.67102 |
| <b>3d</b> | $C_1$    | -1043.98865 | -1043.81295  | -1043.79570 | -1043.85920 |
| <b>3e</b> | $C_1$    | -1120.26023 | -1120.06999  | -1120.05263 | -1120.11567 |
| <b>4</b>  | $C_1$    | -1900.65146 | -1900.01209  | -1899.97043 | -1900.08602 |
| <b>5</b>  | $C_1$    | -833.24283  | -833.16622   | -833.15355  | -833.20496  |
| <b>6</b>  | $C_1$    | -840.26139  | -840.19155   | -840.17977  | -840.22926  |
| <b>7</b>  | $C_1$    | -1038.96175 | -1038.90384  | -1038.89051 | -1038.94363 |

## 3 Cyclic Voltammetry

Cyclic voltammetry experiments were performed with a Metrohm PGSTAT30 potentiostat under an argon atmosphere with the software Nova 2.0. A standard three electrode cell configuration was employed with an ESA EE047 glassy carbon working electrode ( $\varnothing = 3$  mm), a Pt wire counter electrode, and an Ag/AgNO<sub>3</sub> reference electrode (0.01 mol·L<sup>-1</sup> AgNO<sub>3</sub> in acetonitrile containing 0.1 mol·L<sup>-1</sup> [*n*Bu<sub>4</sub>N][PF<sub>6</sub>]) separated from the solution by a vigor Vycor tip. Experiments on 4-CN-py, **2**, and **4** were conducted in acetonitrile containing 0.1 mol·L<sup>-1</sup> [*n*Bu<sub>4</sub>N][PF<sub>6</sub>]. The concentrations of 4-CN-py, **2**, and **4** were about 0.01 mol·L<sup>-1</sup>. Experiments on [BnPPPh<sub>3</sub>]**5**, [BnPPPh<sub>3</sub>]**6**, and [BnPPPh<sub>3</sub>]**7** were conducted as 0.05 M acetonitrile solutions. The experimental results are referenced against ferrocene as internal standard, which was added to the solution in the course of the CV experiment.



## 4 Single Crystal X-Ray Diffraction

All single-crystals were studied on a XtaLAB Synergy Dualflex, HyPix diffractometer using Cu-K $\alpha$  radiation (micro-focus sealed X-ray tube,  $\lambda = 1.54184 \text{ \AA}$ ).

All structures were solved by intrinsic phasing methods (SHELXT) and refinement is based on full-matrix least-squares calculations on  $F^2$  (SHELXL) [8-11]. All non-hydrogen atoms were refined anisotropically. For CH idealized bond lengths and angles were used. Calculations were carried out using the ShelXle graphical interface [12] or the Olex2 program package [13]. Molecular structure diagrams were drawn with the program Diamond 4.6.4 [14]. Crystallographic data have been deposited with the Cambridge Crystallographic Data Centre. Experimental details, crystal data, and CCDC numbers are collected in Table S2. These data can be obtained free of charge from The Cambridge Crystallographic Data Centre via [www.ccdc.cam.ac.uk/data\\_request/cif](http://www.ccdc.cam.ac.uk/data_request/cif)

**Table S2:** Selected crystal data and details of the refinement of the crystal structures of **2**, (S)-**3b**, (S)-**3b**, **4**, [BnPPh<sub>3</sub>]**5**, [BnPPh<sub>3</sub>]**6**, and [BnPPh<sub>3</sub>]**7**.

| Compound                                                       | <b>2</b>                                                     | (S)- <b>3b</b>                                               | (R)- <b>3b</b>                                               | <b>4</b>                                                       | [BnPPh <sub>3</sub> ] <b>5</b>                     | [BnPPh <sub>3</sub> ] <b>6</b>                    | [BnPPh <sub>3</sub> ] <b>7</b>                    |
|----------------------------------------------------------------|--------------------------------------------------------------|--------------------------------------------------------------|--------------------------------------------------------------|----------------------------------------------------------------|----------------------------------------------------|---------------------------------------------------|---------------------------------------------------|
| Chemical formula                                               | C <sub>9</sub> H <sub>7</sub> BF <sub>6</sub> N <sub>2</sub> | C <sub>7</sub> H <sub>9</sub> BF <sub>6</sub> N <sub>2</sub> | C <sub>7</sub> H <sub>9</sub> BF <sub>6</sub> N <sub>2</sub> | C <sub>30</sub> H <sub>39</sub> BF <sub>6</sub> N <sub>2</sub> | C <sub>29</sub> H <sub>25</sub> BF <sub>6</sub> NP | C <sub>28</sub> H <sub>25</sub> BF <sub>7</sub> P | C <sub>28</sub> H <sub>23</sub> BF <sub>9</sub> P |
| <i>M</i> [g·mol <sup>-1</sup> ]                                | 267.98                                                       | 245.97                                                       | 245.97                                                       | 552.42                                                         | 543.28                                             | 536.25                                            | 572.24                                            |
| <i>T</i> [K]                                                   | 100.0(20)                                                    | 100.0(1)                                                     | 99.9(1)                                                      | 100.0(1)                                                       | 100.0(20)                                          | 95.0(20)                                          | 100.0(2)                                          |
| Crystal system                                                 | triclinic                                                    | triclinic                                                    | triclinic                                                    | triclinic                                                      | monoclinic                                         | monoclinic                                        | monoclinic                                        |
| Space group                                                    | <i>P</i> $\bar{1}$                                           | <i>P</i> 1                                                   | <i>P</i> 1                                                   | <i>P</i> $\bar{1}$                                             | <i>P</i> 2 <sub>1</sub> /c                         | <i>P</i> 2 <sub>1</sub> /c                        | <i>P</i> 2 <sub>1</sub> /c                        |
| <i>a</i> [Å]                                                   | 6.9476(3)                                                    | 5.3235(3)                                                    | 5.3211(2)                                                    | 9.18820(10)                                                    | 11.5147(2)                                         | 11.18190(10)                                      | 11.09140(10)                                      |
| <i>b</i> [Å]                                                   | 10.3117(5)                                                   | 7.0486(4)                                                    | 7.0515(3)                                                    | 9.6919(2)                                                      | 15.5359(2)                                         | 14.9172(2)                                        | 15.00700(10)                                      |
| <i>c</i> [Å]                                                   | 15.4000(5)                                                   | 7.2349(4)                                                    | 7.2263(3)                                                    | 18.0035(3)                                                     | 14.8098(2)                                         | 15.3878(2)                                        | 15.48890(10)                                      |
| $\alpha$ [°]                                                   | 86.644(3)                                                    | 79.091(4)                                                    | 79.093(3)                                                    | 88.8120(10)                                                    | 90                                                 | 90                                                | 90                                                |
| $\beta$ [°]                                                    | 88.402(3)                                                    | 73.788(4)                                                    | 73.742(4)                                                    | 88.4840(10)                                                    | 92.8730(10)                                        | 90.0640(10)                                       | 91.1140(10)                                       |
| $\gamma$ [°]                                                   | 83.768(4)                                                    | 73.518(4)                                                    | 73.522(4)                                                    | 68.367(2)                                                      | 90                                                 | 90                                                | 90                                                |
| Volume [Å <sup>3</sup> ]                                       | 1094.62(8)                                                   | 248.18(3)                                                    | 247.83(2)                                                    | 1489.68(5)                                                     | 2646.01(7)                                         | 2566.72(5)                                        | 2577.62(3)                                        |
| <i>Z</i>                                                       | 4                                                            | 1                                                            | 1                                                            | 2                                                              | 4                                                  | 4                                                 | 4                                                 |
| <i>D</i> <sub>calc</sub> [Mg·m <sup>-3</sup> ]                 | 1.626                                                        | 1.646                                                        | 1.646                                                        | 1.232                                                          | 1.364                                              | 1.388                                             | 1.475                                             |
| $\mu$ [mm <sup>-1</sup> ]                                      | 1.531                                                        | 1.616                                                        | 1.618                                                        | 0.819                                                          | 1.467                                              | 1.549                                             | 1.697                                             |
| <i>F</i> (000) [e]                                             | 536                                                          | 124                                                          | 124                                                          | 584                                                            | 1120                                               | 1104                                              | 1168                                              |
| Reflections collected                                          | 10778                                                        | 5072                                                         | 9853                                                         | 61302                                                          | 37719                                              | 113721                                            | 52773                                             |
| Independent reflections                                        | 3964                                                         | 1667                                                         | 1962                                                         | 5388                                                           | 5402                                               | 5237                                              | 5270                                              |
| <i>R</i> (int)                                                 | 0.0379                                                       | 0.0380                                                       | 0.0500                                                       | 0.0430                                                         | 0.0467                                             | 0.0789                                            | 0.0418                                            |
| Parameters / restraints                                        | 469 / 618                                                    | 154 / 3                                                      | 154 / 3                                                      | 533 / 846                                                      | 415 / 322                                          | 593 / 1615                                        | 2395 / 707                                        |
| <i>R</i> 1[ <i>I</i> > 2 $\sigma$ ( <i>I</i> )] <sup>[a]</sup> | 0.0532                                                       | 0.0398                                                       | 0.0327                                                       | 0.0502                                                         | 0.0483                                             | 0.0542                                            | 0.0396                                            |
| <i>wR</i> 2 (all) <sup>[b]</sup>                               | 0.1274                                                       | 0.1033                                                       | 0.0734                                                       | 0.1048                                                         | 0.1091                                             | 0.1092                                            | 0.0821                                            |
| GooF on <i>F</i> <sup>2</sup> [c]                              | 1.195                                                        | 0.868                                                        | 1.160                                                        | 1.007                                                          | 1.067                                              | 1.022                                             | 1.113                                             |
| Largest diff. peak / hole [e·Å <sup>-3</sup> ]                 | 0.474 / -0.539                                               | 0.314 / -0.249                                               | 0.207 / -0.212                                               | 0.280 / -0.531                                                 | 0.469 / -0.468                                     | 0.567 / -0.585                                    | 0.378 / -0.369                                    |
| CCDC no.                                                       | 2304957                                                      | 2304958                                                      | 2304959                                                      | 2304960                                                        | 2304961                                            | 2304962                                           | 2304963                                           |

## 5 Literature

1. Kohn, W.; Sham, L. Self-consistent equations including exchange and correlation effects. *Phys. Rev. A* **1965**, *140*, 1133–1138.
2. Becke, A.D. Density-functional exchange-energy approximation with correct asymptotic behavior. *Phys. Rev. A* **1988**, *38*, 3098–3100.
3. Becke, A.D. Density-functional thermochemistry. I. The effect of the exchange-only gradient correction. *J. Chem. Phys.* **1992**, *96*, 2155–2160.
4. Lee, C.; Yang, W.; Parr, R.G. Development of the colle-salvetti correlation-energy formula into a functional of the electron density. *Phys. Rev. B* **1988**, *37*, 785–789.
5. Becke, A.D. Density-functional thermochemistry. Iii. The role of exact exchange. *J. Chem. Phys.* **1993**, *98*, 5648–5652.
6. J. Frisch, G.W.T., H. B. Schlegel, G. E. Scuseria, M. A. Robb, J. R. Cheeseman, G. Scalmani, V. Barone, G. A. Petersson, H. Nakatsuji, X. Li, M. Caricato, A. V. Marenich, J. Bloino, B. G. Blanesko, R. Gomperts, B. Mennucci, H. P. Hratchian, J. V. Ortiz, A. F. Izmaylov, J. L. Sonnenberg, D. Williams-Young, F. Ding, F. Lipparini, F. Egidi, J. Goings, B. Peng, A. Petrone, T. Henderson, D. Ranasinghe, V. G. Zakrzewski, J. Gao, N. Rega, G. Zheng, W. Liang, M. Hada, M. Ehara, K. Toyota, R. Fukuda, J. Hasegawa, M. Ishida, T. Nakajima, Y. Honda, O. Kitao, H. Nakai, T. Vreven, K. Throssell, J. J. A. Montgomery, J. E. Peralta, F. Ogliaro, M. J. Bearpark, J. J. Heyd, E. N. Brothers, K. N. Kudin, V. N. Staroverov, T. A. Keith, R. Kobayashi, J. Normand, K. Raghavachari, A. P. Rendell, J. C. Burant, S. S. Iyengar, J. Tomasi, M. Cossi, J. M. Millam, M. Klene, C. Adamo, R. Cammi, J. W. Ochterski, R. L. Martin, K. Morokuma, O. Farkas, J. B. Foresman, D. J. Gaussian 16, revision a.03,. Gaussian, Inc.: Wallingford CT, USA, 2016.
7. Rienstra-Kiracofe, J.C.; Tschumper, G.S.; Schaefer, H.F.; Nandi, S.; Ellison, G.B. Atomic and molecular electron affinities: Photoelectron experiments and theoretical computations. *Chem. Rev.* **2002**, *102*, 231–282.
8. Sheldrick, G.M. *Shelxt, program for crystal structure solution*, Universität Göttingen: 2014.
9. Sheldrick, G.M. A short history of shelx. *Acta Crystallogr.* **2008**, *A64*, 112–122.
10. Sheldrick, G.M. Crystal structure refinement with shelxl. *Acta Crystallogr. Sect. C: Cryst. Struct. Commun.* **2015**, *71*, 3–8.
11. Dolomanov, O.V.; Bourhis, L.J.; Gildea, R.J.; Howard, J.A.K.; Puschmann, H. Olex2: A complete structure solution, refinement and analysis program. *J. Appl. Crystallogr.* **2009**, *42*, 339–341.
12. Hübschle, C.B.; Sheldrick, G.M.; Dittrich, B. Shelxle: A qt graphical user interface for shelxl. *J. Appl. Crystallogr.* **2011**, *44*, 1281–1284.
13. Dolomanov, O. V.; Bourhis, L. J.; Gildea, R. J.; Howard, J. A. K.; Puschmann, H. OLEX2: A Complete Structure Solution, Refinement and Analysis Program. *J. Appl. Crystallogr.* **2009**, *42*, 339–341.
14. Brandenburg, K. *Diamond 4.6.4*, Crystal Impact GbR: Bonn, Germany, 1997–2020.
